# Supplementary material
Source: PubMed Central journal article supplement (PMC3806892)
Supplement: NIHMS467261-supplement-Suppl_Figures_S1-S4.pdf [file NIHMS467261-supplement-Suppl_Figures_S1-S4.pdf]

## Supplemental Figure S1

4-month  $p53^{-/-}$  mice (without *TCL1-Tg*)

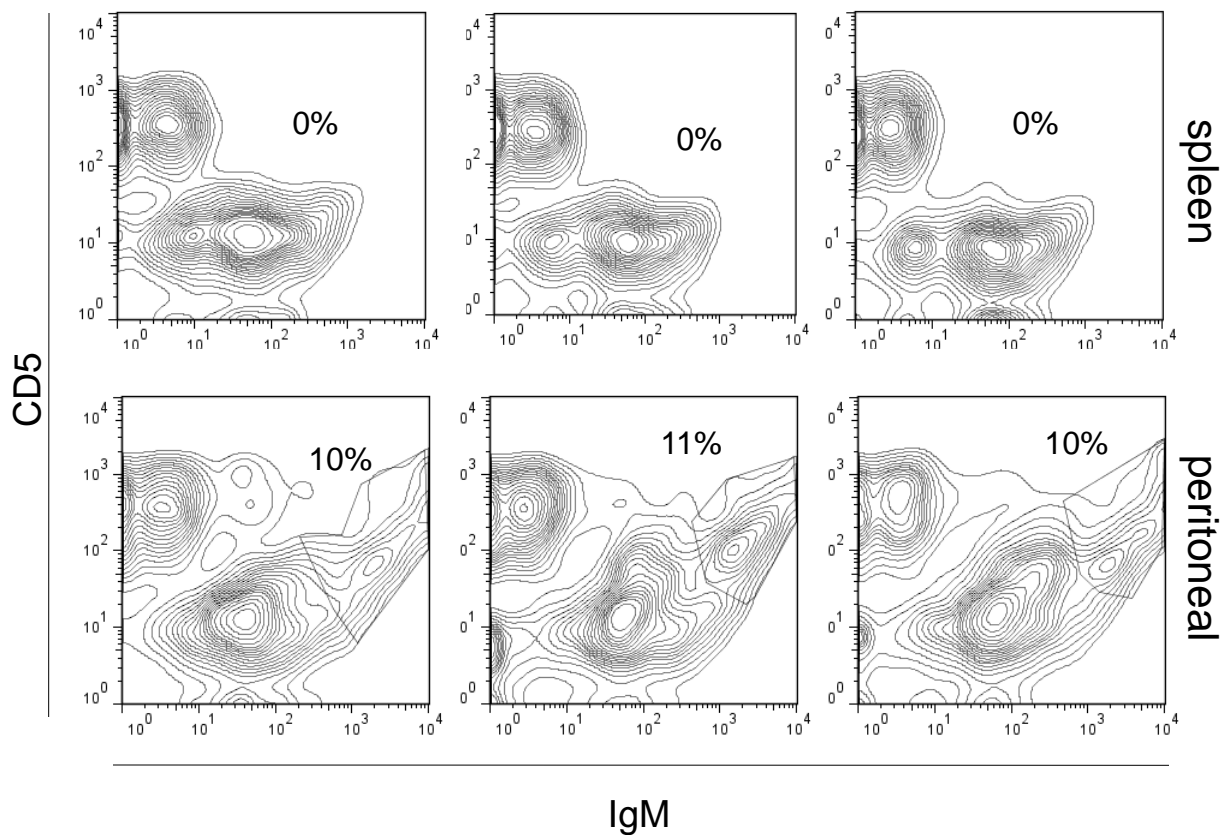

**Fig S1.** Flow cytometry analysis of splenocytes and peritoneal cavity (PC) cells from  $p53^{-/-}$  mice without *TCL1-Tg* at 4-month old of age. The splenocytes and PC cells from three mice were analyzed, and representative flow cytometry plots are shown. The number in each panel shows the % of CD5<sup>+</sup>/IgM<sup>+</sup> cells.

## Supplemental Figure S2

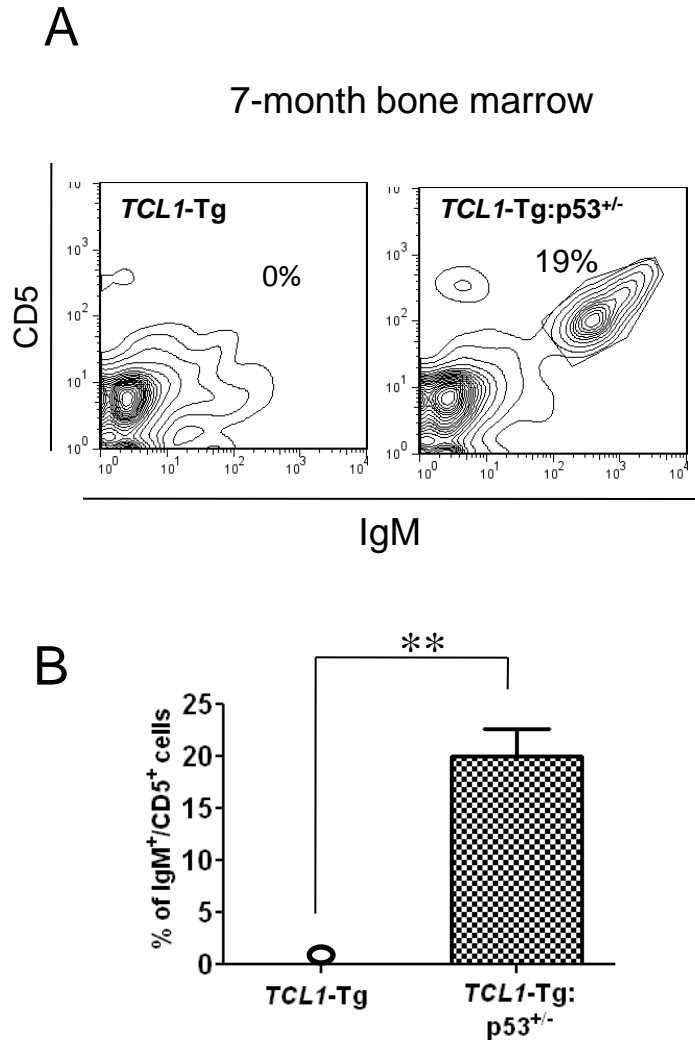

**Fig S2.** Flow cytometry analysis of bone marrow cells from age-match (7 month) *TCL1-Tg* and *TCL1-Tg;p53<sup>+/-</sup>* mice. A. Representative flow cytometry plots. The number in each panel shows the % of CD5<sup>+</sup>/IgM<sup>+</sup> cells. B. Bar graph showing the mean and standard deviation of the percentage of CD5<sup>+</sup>/IgM<sup>+</sup> cells in the bone marrow of *TCL1-Tg* and *TCL1-Tg;p53<sup>+/-</sup>* mice (n =4 per group); the symbol "O" indicates CD5<sup>+</sup>/IgM<sup>+</sup> cells undetectable in *TCL1-Tg* mice. *TCL1-Tg;p53<sup>+/-</sup>* mice died before 7 month and no bone marrow data is available for the 7-month time point.

## Supplemental Figure S3

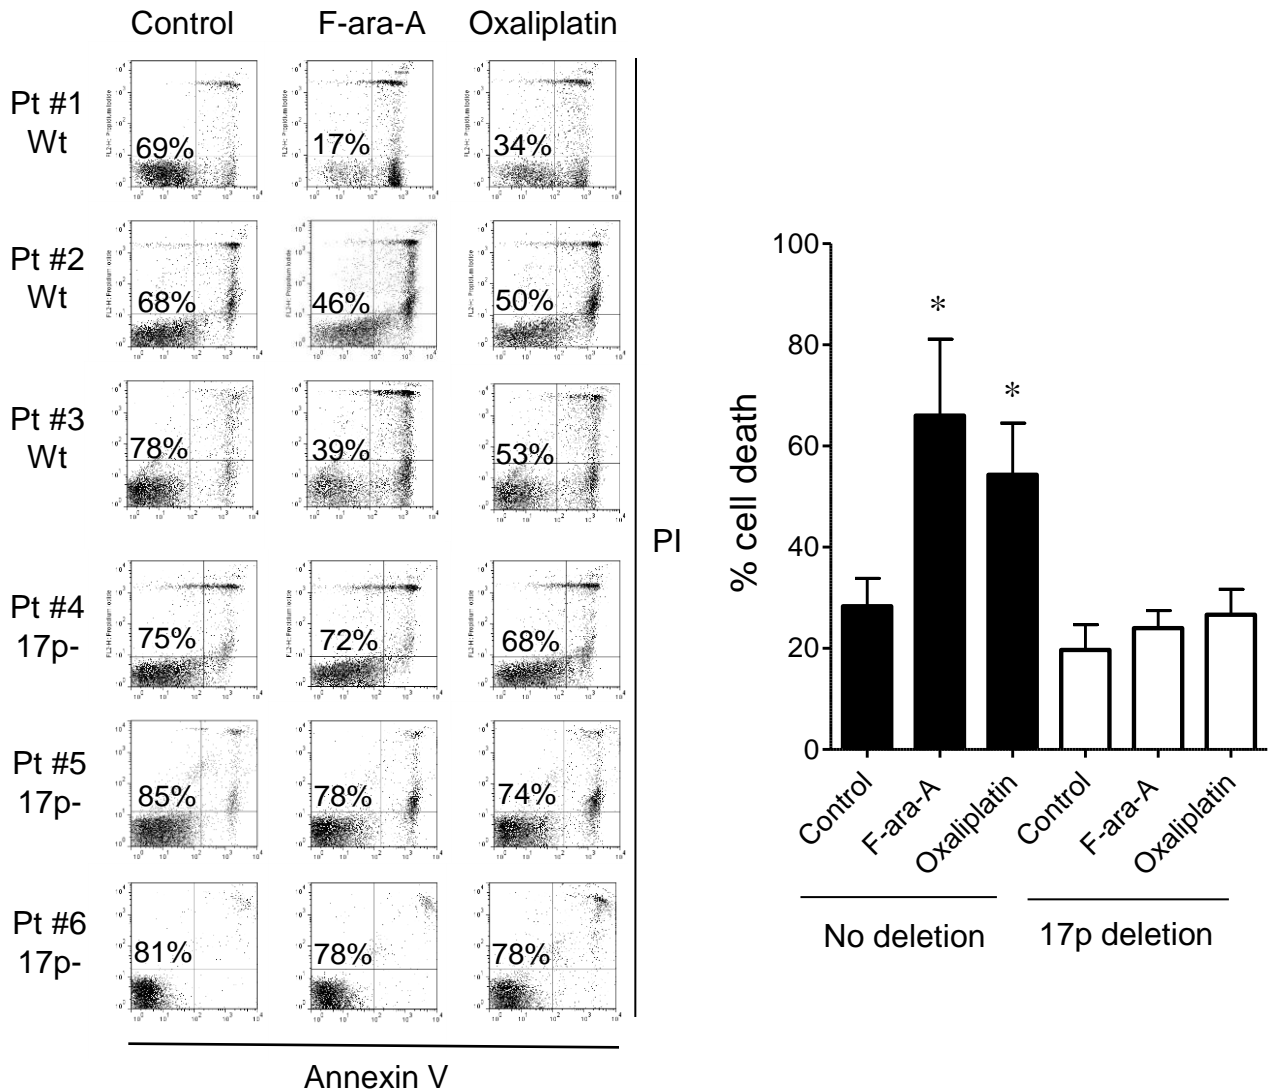

**Fig S3.** Flow cytometry analysis of drug-induced cell death in purified CD19<sup>+</sup> CLL Cells isolated from CLL patient blood samples without 17p deletion (patients #1-3, wt) or with 17p deletion (#4-6, 17p-). Purified CLL cells were treated with 10  $\mu$ M F-ara-A or 10  $\mu$ M Oxaliplatin for 48h, and cell viability was measured by annexin V/PI double staining. The number in each panel shows % of viable cells. The bar graph on the right side shows the mean  $\pm$  SD of 3 patient samples, \*, p < 0.05 compared to the control.

## Supplemental Figure S4

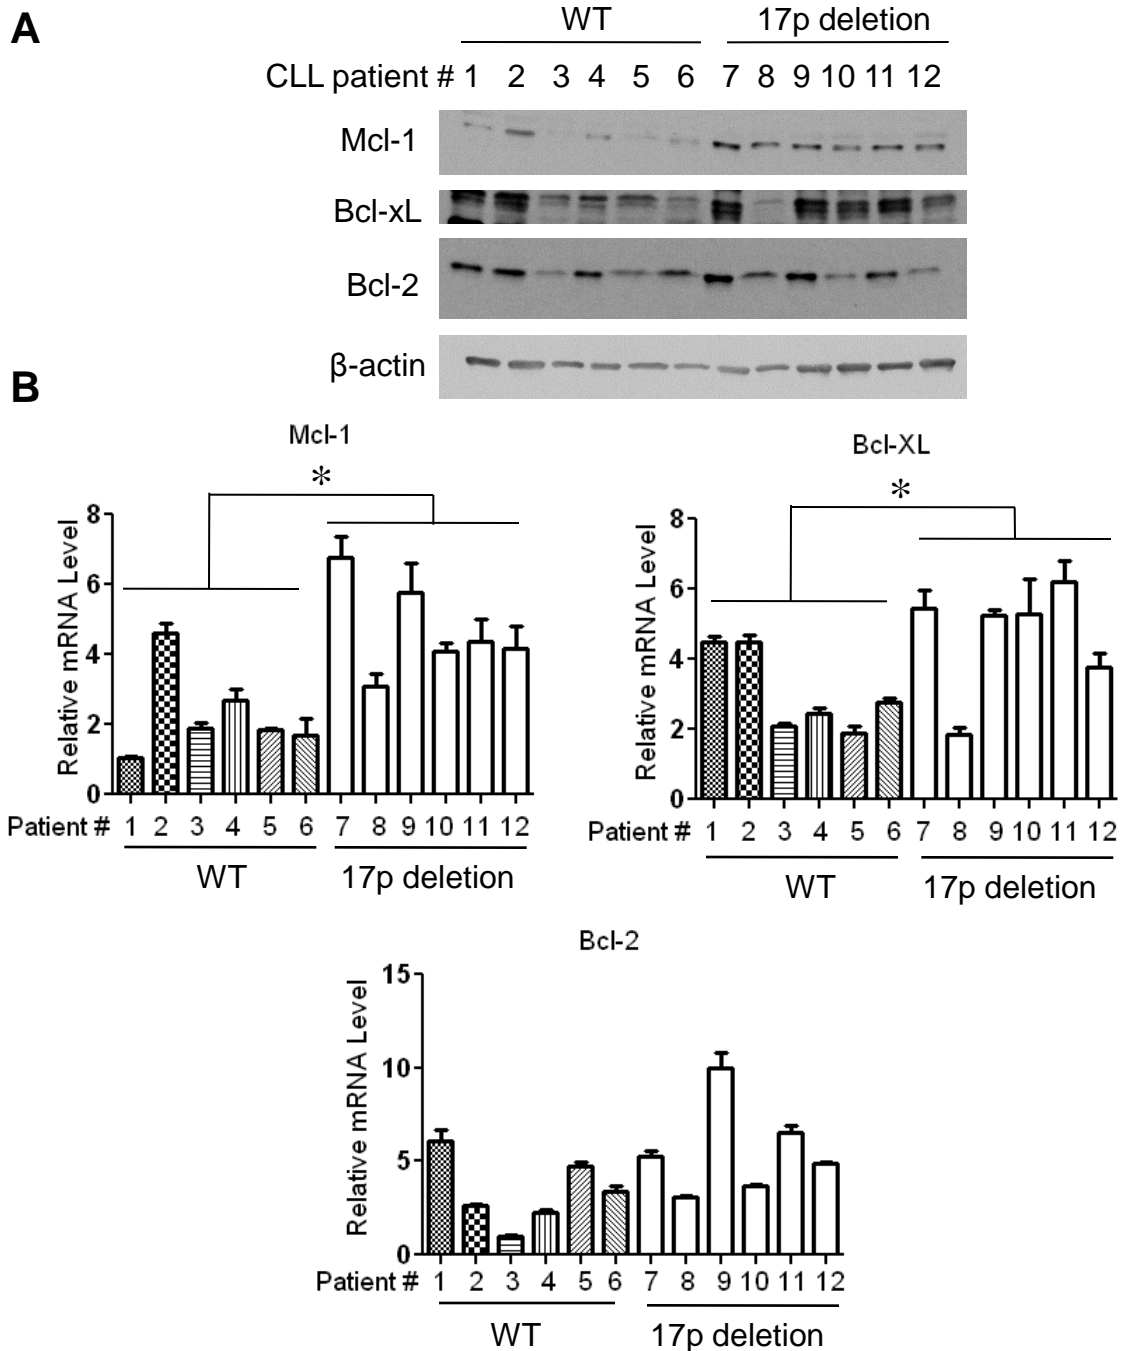

**Fig S4.** Expression of Bcl-2 family members in purified CD19+ CLL cells isolated from the blood samples of CLL patients with or without 17p deletion. (A) Protein expression of the Bcl-2 family members assayed by western blot analysis. (B) mRNA expression of the Bcl-2 family members measured by real time RT-PCR. \*,  $p < 0.05$  comparing CLL cells with 17p deletion to that without 17p deletion.
